# Supplementary material
Source: PubMed Central journal article supplement (PMC7011627)

# Supplementary Figure 1

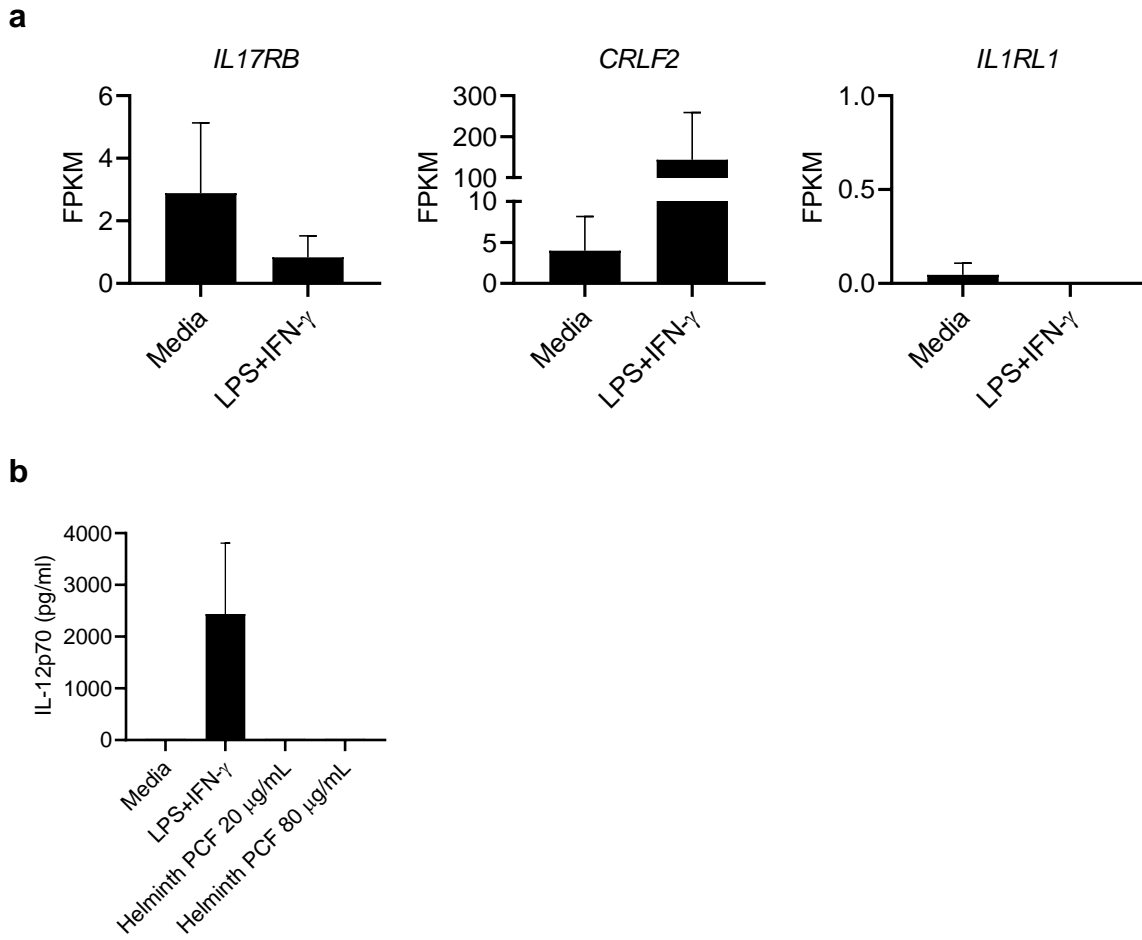

Supplement: IMM-159-322-s001.pdf [file IMM-159-322-s001.pdf]
